# Supplementary material for: Small RNA-Seq to Characterize Viruses Responsible of Lettuce Big Vein Disease in Spain
Source: Front Microbiol. 2018 Dec 21;9:3188. doi: 10.3389/fmicb.2018.03188 (PMC6309106; doi:10.3389/fmicb.2018.03188)
Supplement: Supplementary Table 1 — Coverage and sequencing depth of sRNAs mapping to viruses identified by the VirusDetect online tool. [file Table_1.xlsx]

## Sheet: Table S1
Supplementary Table 1. Coverage and sequencing depth of sRNAs mapping to viruses identified by VirusDetect online tool
Sample	Virus genome found	Reads mapping (16 to 31 nts)*	Assembled contigs	Covered length	Depth (Normalized)	Identity	Reference virus
							Accession	Length (nts)	Description
Pool 1	MiLBVV RNA1	33455	20	7494	0.9	0.9889	AF525933	7794	Mirafiori lettuce big-vein virus isolate LS301-O; putative RNA polymerase and 25K protein genes
		0.103884		0.961509
	MiLBVV RNA2	72944	3	1768	7.5	0.9908	AF525934	1788	Mirafiori lettuce big-vein virus isolate LS301-O; 10K protein and 55K protein genes
		0.226505		0.988814
	MiLBVV RNA3	141809	4	1496	15.3	0.9925	AF525935	1515	Mirafiori lettuce big-vein virus isolate LS301-O; coat protein gene
		0.440345		0.987459
	MiLBVV RNA3	9124	3	151	14.1	0.9342	AY581701	1421	Mirafiori lettuce virus isolate MiLBVV-ALM4; coat protein gene
		0.0283318		0.106263
	MiLBVV RNA4	8632	5	1356	1.4	0.9912	AF525936	1402	Mirafiori lettuce big-vein virus isolate LS301-O; 10.6K protein and 37K protein genes
		0.026804		0.96719
	LBVaV RNA1	15218	49	5529	0.4	0.9695	AB075039	6797	Lettuce big-vein virus; pol gene for L protein
		0.0472549		0.813447
	LBVaV RNA2	40859	21	5958	1.2	0.9812	JN710441	6075	Lettuce big-vein associated virus isolate Ls302; coat protein, protein 2, protein 3, protein 4, and protein 5 genes
		0.126875		0.980741
Pool 2	MiLBVV RNA1	441728	3	7758	13.3	0.9893	AF525933	7794	Mirafiori lettuce big-vein virus isolate LS301-O; putative RNA polymerase and 25K protein genes
		0.0963903		0.995381
	MiLBVV RNA2	1075171	2	1784	55.6	0.9902	AF525934	1788	Mirafiori lettuce big-vein virus isolate LS301-O; 10K protein and 55K protein genes
		0.234615		0.997763
	MiLBVV RNA3	1948096	5	1512	66.9	0.9855	AF525935	1515	Mirafiori lettuce big-vein virus isolate LS301-O; coat protein gene
		0.425098		0.99802
	MiLBVV RNA3	99927	4	306	37.7	0.9577	AY581701	1421	Mirafiori lettuce virus isolate MiLBVV-ALM4; coat protein gene
		0.0218053		0.215341
	MiLBVV RNA4	102203	1	1391	19.4	0.9899	AF525936	1402	Mirafiori lettuce big-vein virus isolate LS301-O; 10.6K protein and 37K protein genes
		0.0223019		0.992154
	LBVaV RNA1	294212	28	6346	12.7	0.962	AB075039	6797	Lettuce big-vein virus; pol gene for L protein
		0.0642006		0.933647
	LBVaV RNA2	545360	6	6062	20.1	0.9812	JN710441	6075	Lettuce big-vein associated virus isolate Ls302; coat protein, protein 2, protein 3, protein 4, and protein 5 genes
		0.119004		0.99786
	RWMV RNA1	14514	16	3858	1	0.971	AF335429	4018	Ranunculus white mottle virus RNA1; putative RNA polymerase gene (partial)
		0.00316713		0.960179
	RWMV RNA2	58526	6	847	15.2	0.9391	AY542957	1063	Ranunculus white mottle virus; coat protein gene (partial)
		0.0127711		0.796802
	RWMV	2964	1	257	3.2	0.9611	AF335430	263	Ranunculus white mottle virus; unknown gene
		0.00064678		0.977186
Pool 3	MiLBVV RNA1	21642	66	5627	1	0.9581	AF525933	7794	Mirafiori lettuce big-vein virus isolate LS301-O; putative RNA polymerase and 25K protein genes
		0.104665		0.721966
	MiLBVV RNA2	21062	9	1612	7.4	0.94	AF525934	1788	Mirafiori lettuce big-vein virus isolate LS301-O; 10K protein and 55K protein genes
		0.10186		0.901566
	MiLBVV RNA3	15942	2	1442	6.6	0.9727	AF525935	1515	Mirafiori lettuce big-vein virus isolate LS301-O; coat protein gene
		0.0770987		0.951815
	MiLBVV RNA3	46038	3	1414	11.4	0.9803	AY581701	1421	Mirafiori lettuce virus isolate MiLBVV-ALM4; coat protein gene
		0.222649		0.995074
	MiLBVV RNA4	6160	13	910	2.8	0.9301	AF525936	1402	Mirafiori lettuce big-vein virus isolate LS301-O; 10.6K protein and 37K protein genes
		0.029791		0.649073
	LBVaV RNA1	34244	43	6145	1.3	0.9624	AB075039	6797	Lettuce big-vein virus; pol gene for L protein
		0.165611		0.904075
	LBVaV RNA2	58639	19	5976	2.2	0.9803	JN710441	6075	Lettuce big-vein associated virus isolate Ls302; coat protein, protein 2, protein 3, protein 4, and protein 5 genes
		0.28359		0.983704
	MNSV	3047	17	1116	0.2	0.9991	AY122286	4271	Melon necrotic spot virus isolate Malfa5
		0.0147359		0.261297
					*Reads refer to vsRNAs in each pool; addition of percentages is 100% for each pool

## Sheet: Table S2
Supplementary Table 2. Percentage of identity of viral contigs assembled by VirusDetect against CP sequences of LBVD-associated viruses collected from NCBI
MiLBVV CPs	Pool 1	Pool 2	Pool 3	Pool 3*
AAN60449.1_LS301-0	99.54	99.39	97.03	86.62
AF532872.1_JAPAN	99.24	99.09	96.73	88.325
AY366415.1_SPAIN:MURCIA	96.88	96.73	94.75	87.345
AY366416.1_SPAIN:GALICIA	97.11	96.96	95.13	87.725
AY366417.1_SPAIN:ALMERIA	88.96	88.81	89.95	97.955
AY366418.1_SPAIN:ALMERIA	97.49	97.34	95.28	87.955
AY581692.1_DENMARK	98.93	98.78	96.58	87.94
AY581693.1_NETHERLANDS	98.93	98.78	96.58	88.03
AY581694_UNITED_KINGDOM	98.93	98.78	96.5	87.87
AY581695.1_GERMANY:FISHENICH	99.01	98.86	96.5	87.725
AY581696.1_AUSTRALIA	99.24	99.09	96.73	88.1
AY581697.1_GERMANY:RESKIA	99.01	98.86	96.65	88.095
AY581698.1_GERMANY:FRANKFURT	97.18	97.11	95.36	88.02
AY581699.1_ITALY	97.03	96.96	95.21	88.025
AY581700.1_SPAIN:ALMERIA	96.65	96.5	94.68	87.125
AY581701.1_SPAIN:ALMERIA	88.89	88.74	89.88	98.035
AY839624.1_SPAIN	88.51	88.36	89.88	98.345
AY839625.1_SPAIN	88.74	88.58	90.18	98.255
AY839626.1_SPAIN	88.81	88.66	90.26	98.335
AY839627.1_SPAIN	88.51	88.36	89.88	98.345
FJ864680.1_ARGENTINA	97.03	96.88	94.9	87.495
FJ864681.1_ARGENTINA	96.88	96.73	94.75	87.58
LBVaV CPs	Pool 1	Pool 2	Pool 3
AY581684.1_SPAIN:ALMERIA	99.0787	98.91	99.75
AY366411.1_SPAIN:MURCIA	98.995	98.83	99.66
AY581688.1_SPAIN:ALMERIA	98.995	98.83	99.66
AY366413.1_SPAIN:ALMERIA	98.9112	98.74	99.58
AY581685.1_SPAIN:ALMERIA	95.6449	98.74	99.58
AY366414.1_SPAIN:ALMERIA	98.995	98.83	99.5
AY581687.1_SPAIN:ALMERIA	98.8275	98.66	99.5
AY581689.1_SPAIN:GRANADA	98.7437	98.58	99.41
AY839619.1_SPAIN	98.66	98.49	99.33
AY839621.1_SPAIN	98.66	98.49	99.33
AY581686.1_SPAIN:ALMERIA	95.3936	98.66	99.16
AY839620.1_SPAIN	98.325	98.16	98.99
AY839623.1_SPAIN	98.0737	97.99	98.83
AY839622.1_SPAIN	97.9062	97.74	98.58
JN710441.1_NETHERLANDS	97.8224	98.41	98.41
GU220725.1_AUSTRALIA	97.6549	98.74	98.24
AY366412.1_SPAIN:GALICIA	97.3199	98.74	97.91
AY581690.1_UNITED_KINGDOM	94.1374	97.91	97.91
GU220723.1_AUSTRALIA	97.0687	98.32	97.82
GU220727.1_AUSTRALIA	97.1524	98.24	97.82
GU220726.1_AUSTRALIA	97.1524	98.24	97.74
GU220724.1_AUSTRALIA	93.6348	97.99	97.49
AY839618.1_SPAIN	96.8174	98.07	97.4
GU220722.1_AUSTRALIA	96.5662	97.82	97.32
AY581691.1_SPAIN:MURCIA	95.8124	97.15	96.4
AB190526.1_JAPAN	95.3936	96.15	95.98
AB190527.1_JAPAN	92.2111	96.15	95.81
AB050272.1_JAPAN	95.1424	96.06	95.73
AB114138_JAPAN	95.1424	96.06	95.73
AB190528.1_JAPAN	95.1424	96.06	95.73
The isolates found by VirusDetect are higlighted in yellow and the isolates with the highest percentage of identity by BLASTN are in bold.
* In Pool 3, contigs with different percentages of identity against different MiLBVV isolates were identified by the VirusDetect online tool, suggesting mixed strain MiLBVV infections in this pool.

## Sheet: Table S3
Supplementary Table 3. List of MiLBVV and LBVaV isolates from NCBI used for phylogenetic analysis.
ACCESSION NUMBER	ISOLATE	VIRUS	ISOLATE LOCALITY	SPECIES ISOLATED FROM	REFERENCE
AB050272	CP	LBVaV	Japa: Kagawa	Lettuce	Sasaya et al. (2001)
AB114138	CP	LBVaV	Japa: Kagawa	Lettuce	Sasaya et al. (2004)
AB190526	A	LBVaV	Kannonji: Japan	Lettuce	Sasaya (2005)
AB190527	Hy	LBVaV	Japan: Nandan	Lettuce	Sasaya (2005)
AB190528	Wa	LBVaV	Japan: Hiochigawa	Lettuce	Sasaya (2005)
AY366411	MUR1	LBVaV	Spain: Murcia	Lettuce	Navarro et al. (2004)
AY366412	GAL1	LBVaV	Spain: Galicia	Lettuce	Navarro et al. (2004)
AY366413	ALM1	LBVaV	Spain: Almeria	Lettuce	Navarro et al. (2004)
AY366414	ALM2	LBVaV	Spain: Almeria	Lettuce	Navarro et al. (2004)
AY581684	ALM3	LBVaV	Spain: Almeria	Lettuce	Navarro et al. (2004)
AY581685	ALM4	LBVaV	Spain: Almeria	Lettuce	Navarro et al. (2004)
AY581686	ALM5	LBVaV	Spain: Almeria	Lettuce	Navarro et al. (2004)
AY581687	ALM6	LBVaV	Spain: Almeria	Lettuce	Navarro et al. (2004)
AY581688	ALM7	LBVaV	Spain: Almeria	Lettuce	Navarro et al. (2004)
AY581689	GRA1	LBVaV	Spain: Granada	Lettuce	Navarro et al. (2004)
AY581690	UK2	LBVaV	United Kingdom	Lettuce	Navarro et al. (2004)
AY581691	MUR2	LBVaV	Spain: Murcia	Lettuce	Navarro et al. (2004)
AY839618	SON1	LBVaV	Spain	Lettuce	Navarro et al. (2005)
AY839619	SON2	LBVaV	Spain: Almería	Sowthistle	Navarro et al. (2005)
AY839620	SON3	LBVaV	Spain: Almería	Sowthistle	Navarro et al. (2005)
AY839621	SON4	LBVaV	Spain: Almería	Sowthistle	Navarro et al. (2005)
AY839622	SON5	LBVaV	Spain: Granada	Sowthistle	Navarro et al. (2005)
AY839623	SON6	LBVaV	Spain: Granada	Sowthistle	Navarro et al. (2005)
GU220722	AUSE5	LBVaV	Australia	Lettuce	Maccarone (2009)
GU220723	AUSA5	LBVaV	Australia	Lettuce	Maccarone (2009)
GU220724	AUSB1	LBVaV	Australia	Lettuce	Maccarone (2009)
GU220725	AUSB2	LBVaV	Australia	Lettuce	Maccarone (2009)
GU220726	AUSG1	LBVaV	Australia	Lettuce	Maccarone (2009)
GU220727	AUSE6	LBVaV	Australia	Lettuce	Maccarone (2009)
JN710441	Ls302	LBVaV	Netherlands	Lettuce	Verbeek et al. (2013)
AF532872	JPN1	MiLBVV	Japan: Hyogo	Lettuce	Kawazu et al (2003)
AY366415	MUR1	MiLBVV	Spain: Murcia	Lettuce	Navarro et al. (2005)
AY366416	GAL1	MiLBVV	Spain: Galicia	Lettuce	Navarro et al. (2004)
AY366417	ALM1	MiLBVV	Spain: Almería	Lettuce	Navarro et al. (2004)
AY366418	ALM2	MiLBVV	Spain: Almería	Lettuce	Navarro et al. (2004)
AY581692	DEN1	MiLBVV	Denmark	Lettuce	Navarro et al. (2005)
AY581693	HOL2	MiLBVV	Netherlands	Lettuce	Navarro et al. (2005)
AY581694	UK1	MiLBVV	United Kingdom	Lettuce	Navarro et al. (2005)
AY581695	GER1	MiLBVV	Germany: Fishenich	Lettuce	Navarro et al. (2005)
AY581696	AUS1	MiLBVV	Australia	Lettuce	Navarro et al. (2005)
AY581697	GER2	MiLBVV	Germany: Reskia	Lettuce	Navarro et al. (2005)
AY581698	GER3	MiLBVV	Germany: Frankfurt	Lettuce	Navarro et al. (2005)
AY581699	ITA1	MiLBVV	Italy	Lettuce	Navarro et al. (2005)
AY581700	ALM3	MiLBVV	Spain: Almería	Lettuce	Navarro et al. (2005)
AY581701	ALM4	MiLBVV	Spain: Almería	Lettuce	Navarro et al. (2005)
AY839624	SON1	MiLBVV	Spain: Almería	Sowthistle	Navarro et al. (2004)
AY839625	SON2	MiLBVV	Spain: Almería	Sowthistle	Navarro et al. (2004)
AY839626	SON3	MiLBVV	Spain: Almería	Sowthistle	Navarro et al. (2004)
AY839627	SON4	MiLBVV	Spain: Almería	Sowthistle	Unpublished
FJ864680	LP2	MiLBVV	Argentina	Lettuce	Unpublished
FJ864681	LP1	MiLBVV	Argentina	Lettuce	Unpublished
